# Supplementary material for: Magnetic field and temperature sensing with atomic-scale spin defects in silicon carbide
Source: PubMed Central journal article supplement — Sci Rep. 2014 Jul 4;4:5303. doi: 10.1038/srep05303 (PMC4081891; doi:10.1038/srep05303), 2014-07-04
Supplement: srep05303-s1.pdf [file srep05303-s1.pdf]

# Supplemental Material for Magnetic field and temperature sensing with atomic-scale spin defects in silicon carbide

H. Kraus<sup>1</sup>, V. A. Soltamov<sup>2</sup>, F. Fuchs<sup>1</sup>, D. Simin<sup>1</sup>, A. Sperlich<sup>1</sup>,

P. G. Baranov<sup>2</sup>, G. V. Astakhov<sup>1,\*</sup> and V. Dyakonov<sup>1,3†</sup>

<sup>1</sup>*Experimental Physics VI, Julius-Maximilian University of Würzburg, 97074 Würzburg, Germany*

<sup>2</sup>*Ioffe Physical-Technical Institute, 194021 St. Petersburg, Russia*

<sup>3</sup>*Bavarian Center for Applied Energy Research (ZAE Bayern), 97074 Würzburg, Germany*

## I. CALCULATION OF THE ODMR SPECTRA

We consider a spin defect with the symmetry axis along the  $z$ -axis. The external magnetic field  $B$  lies in the  $xz$ -plane and its orientation is given by the polar angle  $\theta$ , such that  $B_z = B \cos \theta$  and  $B_x = B \sin \theta$ . The spin Hamiltonian for the  $S = 3/2$  system is written in the form

$$\mathcal{H} = g_e \mu_B B (S_z \cos \theta + S_x \sin \theta) + D(S_z^2 - \frac{5}{4}\mathcal{I}). \quad (\text{S1})$$

Here,  $\mathcal{I}$  is the unit matrix,  $S_z$  and  $S_x$  denote the spin matrices

$$S_z = \begin{bmatrix} \frac{3}{2} & 0 & 0 & 0 \\ 0 & \frac{1}{2} & 0 & 0 \\ 0 & 0 & -\frac{1}{2} & 0 \\ 0 & 0 & 0 & -\frac{3}{2} \end{bmatrix}, \quad S_x = \begin{bmatrix} 0 & \frac{\sqrt{3}}{2} & 0 & 0 \\ \frac{\sqrt{3}}{2} & 0 & 1 & 0 \\ 0 & 1 & 0 & \frac{\sqrt{3}}{2} \\ 0 & 0 & \frac{\sqrt{3}}{2} & 0 \end{bmatrix}. \quad (\text{S2})$$

The numerical solution of the Hamiltonian (S1) gives the eigenstates  $E_k$  and the eigenfunctions in the basis

$$\psi_k = \begin{bmatrix} a_{3/2} \\ a_{1/2} \\ a_{-1/2} \\ a_{-3/2} \end{bmatrix}. \quad (\text{S3})$$

It is instructive to consider analytically weak magnetic fields  $g_e \mu_B B \ll 2D$ , which is the most relevant for magnetic field sensing. In this case, the  $m_s = \pm 3/2$  and  $m_s = \pm 1/2$  states can be considered separately. For the  $m_s = \pm 3/2$  states the Hamiltonian (S1) is simplified to the form

$$\mathcal{H} = \frac{3}{2} g_e \mu_B B \begin{bmatrix} \cos \theta & 0 \\ 0 & -\cos \theta \end{bmatrix} + D \quad (\text{S4})$$

and the solution is  $E_{1,4} = D \pm \frac{3}{2} g_e \mu_B B \cos \theta$  with the eigenfunctions

$$\psi_1 = \begin{bmatrix} 1 \\ 0 \\ 0 \\ 0 \end{bmatrix}, \quad \psi_4 = \begin{bmatrix} 0 \\ 0 \\ 0 \\ 1 \end{bmatrix}. \quad (\text{S5})$$

For the  $m_s = \pm 1/2$  states the Hamiltonian (S1) is simplified to the form

$$\mathcal{H} = \frac{1}{2} g_e \mu_B B \begin{bmatrix} \cos \theta & 2 \sin \theta \\ 2 \sin \theta & -\cos \theta \end{bmatrix} - D \quad (\text{S6})$$

---

\*E-mail: astakhov@physik.uni-wuerzburg.de

†E-mail: dyakonov@physik.uni-wuerzburg.de

and the solution is  $E_{2,3} = -D \pm \frac{1}{2}g_e\mu_B B\sqrt{1+3\sin^2\theta}$  with the eigenfunctions

$$\psi_2 = \begin{bmatrix} 0 \\ \sqrt{\frac{1}{2} + \frac{\cos\theta}{2\sqrt{1+3\sin^2\theta}}} \\ \sqrt{\frac{1}{2} - \frac{\cos\theta}{2\sqrt{1+3\sin^2\theta}}} \\ 0 \end{bmatrix}, \quad \psi_3 = \begin{bmatrix} 0 \\ \sqrt{\frac{1}{2} - \frac{\cos\theta}{2\sqrt{1+3\sin^2\theta}}} \\ \sqrt{\frac{1}{2} + \frac{\cos\theta}{2\sqrt{1+3\sin^2\theta}}} \\ 0 \end{bmatrix}. \quad (\text{S7})$$

One can see from Eq. (S7) that the  $m_s = \pm 1/2$  states are mixed in the transverse component of the magnetic field. This results in four possible RF-driven transitions (see Fig. 2 of the main text). The exclusion, when only two RF-driven transitions are observed, is for three specific polar angles  $\theta = 0^\circ$ ,  $\theta = 90^\circ$  and  $\theta = \arccos(1/\sqrt{3}) \approx 54.7^\circ$ .

We have calculated the relative probabilities of these transitions between the  $j$ -th and  $k$ -th spin sublevels using

$$W_{jk} \sim |B_{1y}\langle j|S_y|k\rangle|^2. \quad (\text{S8})$$

Here, the RF driving field  $B_{1y}$  is applied along the  $y$ -axis, i.e., perpendicular to the defect symmetry axis and the magnetic field  $B$ . In order to account for the optical spin pumping, we assume the same optically induced depletion of the  $m_s = +1/2$  and  $m_s = -1/2$  states. This means that there is no RF-induced transitions between these states, which is taken into account by setting to zero the corresponding components of the spin matrix in (S8):

$$S_y = \begin{bmatrix} 0 & -i\frac{\sqrt{3}}{2} & 0 & 0 \\ i\frac{\sqrt{3}}{2} & 0 & 0 & 0 \\ 0 & 0 & 0 & -i\frac{\sqrt{3}}{2} \\ 0 & 0 & i\frac{\sqrt{3}}{2} & 0 \end{bmatrix}. \quad (\text{S9})$$

The results of these calculations are color-coded in Fig. 2(a) of the main text.

It is worth to note that in our experiments the RF field is not exactly parallel to the  $y$ -axis. To calculate the RF-induced transitions for arbitrage orientation of  $B_1$  we use Eq. (2) in the main text and from the best fit of the ODMR line amplitudes in Fig. 4(b) we find the angle between  $B_1$  and the  $c$ -axis of SiC is  $65^\circ$ .

## II. LASER EFFECT ON THE ODMR SPECTRA

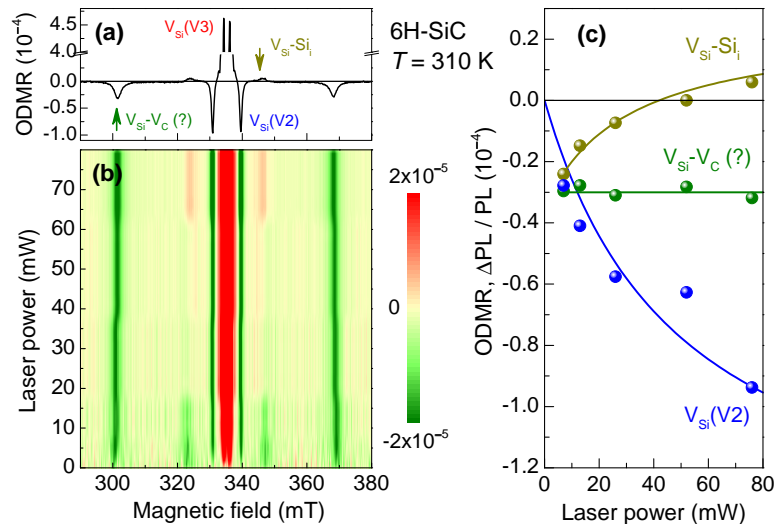

FIG. S1: (a) An ODMR spectrum of 6H-SiC obtained at a laser power  $P = 76$  mW. (b) Laser power dependence of the ODMR spectra. (c) The ODMR contrast of different defects as a function of laser power.

We have measured ODMR spectra as a function of laser power  $P$  to determine the laser-induced heating in our SiC samples. We monitor the temperature variation with  $P$  using the  $V_{Si}-V_C$  defect as an internal thermometer

[Fig. S1(b)]. At  $P = 76$  mW the  $V_{\text{Si}}\text{-}V_{\text{C}}$  ZFS is reduced by 2.3 MHz [Fig. S1(a)], which corresponds to a temperature increase by  $\Delta T = 2.1$  K.

Remarkably, the ODMR contrast  $\Delta\text{PL}/\text{PL}$  as a function of  $P$  reveals qualitatively different behavior for different defects [Fig. S1(c)]. For the  $V_{\text{Si}}(V2)$  defect  $\Delta\text{PL}/\text{PL}$  being proportional to the optically-induced spin polarization is well described by

$$\frac{\Delta\text{PL}}{\text{PL}} = \frac{\alpha_0}{1 + P_0/P}, \quad (\text{S10})$$

where  $\alpha_0 = -1.5 \times 10^{-4}$  is the ODMR contrast in saturation and  $P_0 = 50$  mW is a characteristic pump power (the laser is focused onto a spot of about several hundreds micrometers in diameter).

The ODMR contrast for the  $V_{\text{Si}}\text{-}V_{\text{C}}$  defect is constant  $\alpha_0 = -0.3 \times 10^{-4}$  down to the laser power when the PL is still detectable, i.e.,  $P_0 \ll 7$  mW, indicating a very efficient optical spin pumping mechanism.

For the  $V_{\text{Si}}\text{-}Si_i$  Frenkel pair the ODMR contrast changes its sign with increasing  $P$  [Figs. S1(b) und (c)], which is quite unusual. We expect that the position of the interstitial Si atom within the Frenkel pair is very sensitive to the local strain and/or electric field, which in turn can be induced by photo-(di)charging of the defects nearby.

- 
- [1] Riedel, D. *et al.* Resonant Addressing and Manipulation of Silicon Vacancy Qubits in Silicon Carbide. *Physical Review Letters* **109**, 226402 (2012).  
 [2] von Bardeleben, H., Cantin, J., Henry, L. & Barthe, M. Vacancy defects in p-type 6H-SiC created by low-energy electron irradiation. *Physical Review B* **62**, 10841–10846 (2000).
